# Supplementary material
Source: publisher site journal article supplement (https://www.spandidos-publications.com/7661/downloadSupplementary)

Figure S1. Cell Counting Kit-8 Assay to determine 5-FU sensitivity in HCT8R cells. 5-FU, 5-fluorouracil.

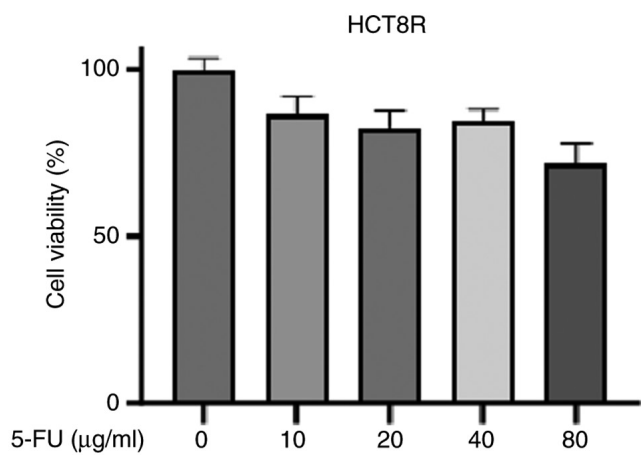

Supplement: Supplementary file 1 [file downloadSupplementary]
